# Supplementary material for: Robust, Durable Gene Activation In Vivo via mRNA-Encoded Activators
Source: PubMed Central journal article supplement — ACS Nano. 2022 Mar 31;16(4):5660–71. doi: 10.1021/acsnano.1c10631 (PMC9047660; doi:10.1021/acsnano.1c10631), 2022-03-31
Supplement: nn1c10631_si_001.pdf [file nn1c10631_si_001.pdf]

## Robust, durable gene activation *in vivo* via mRNA-encoded activators

Jared P. Beyersdorf<sup>1,‡</sup>, Swapnil Bawage<sup>1,‡</sup>, Nahid Iglesias<sup>2,‡</sup>, Hannah E. Peck<sup>1</sup>, Ryan A. Hobbs<sup>1</sup>, Jay A. Wroe<sup>1</sup>, Chiara Zurla<sup>1</sup>, Charles A. Gersbach<sup>2,3,4</sup>, and Philip J. Santangelo<sup>1,\*</sup>

### Supplementary Tables and Figures

#### Supplementary Tables

**Table S1:** Sequences of sgRNA used in the study

| <b>B4galnt2 sgRNA</b>   | <b>Sequence (5' - 3')</b>                                                                                                                                        |
|-------------------------|------------------------------------------------------------------------------------------------------------------------------------------------------------------|
| 1                       | mC*mA*mC*rArUrCrCrUrGrGrArCrGrCrGrArGrGrCrA                                                                                                                      |
| 2                       | mC*mU*mA*rUrUrUrArArGrUrUrGrGrUrCrCrArCrUrG                                                                                                                      |
| 3                       | mU*mG*mG*rArArCrArCrArUrCrCrUrGrGrArCrGrCrG                                                                                                                      |
| 4                       | mG*mC*mG*rUrCrCrArGrGrArUrGrUrGrUrUrCrCrArA                                                                                                                      |
| 5                       | mG*mU*mU*rGrGrUrCrCrArCrUrGrUrGrGrCrUrGrUrG                                                                                                                      |
| Non Target              | mG*mC*mA*rCrUrArCrCrArGrArGrCrUrArArCrUrCrA                                                                                                                      |
| <b>Epo sgRNA</b>        | <b>Sequence (5' - 3')</b>                                                                                                                                        |
| 1                       | mC*mC*mC*rUrGrGrCrCrArArGrGrGrUrCrCrGrUrUrC                                                                                                                      |
| 2                       | mU*mG*mA*rGrArCrArCrArGrCrCrArCrCrGrGrCrCrA                                                                                                                      |
| 3                       | mU*mG*mU*rCrUrCrArCrUrGrUrGrUrUrCrCrCrGrArA                                                                                                                      |
| 4                       | mC*mC*mC*rGrArArCrGrGrArCrCrCrUrUrGrGrCrCrA                                                                                                                      |
| 5                       | mC*mC*mC*rUrGrGrCrCrArArGrGrGrUrCrCrGrUrUrC                                                                                                                      |
| Modified sgRNA scaffold | rGrUrUrUrUrArGrAmGmCmUmAmGmAmAmAmUrAmGmCrArArGrUrUrArArArArUrArArGrGrCrUrArGrUrCrCrGrUrUrArUrCrAmAmCmUmUmGmAmAmAmAmAmGmUmGmGmCmAmCmCmGmAmGmUmCmGmGmUmGmCmU*mU*mU |

**Abbreviations:** r= ribonucleotide base, m=phosphorothioated 2' O-methyl ribonucleotide base, \*= Phosphorothioate bond

**Table S2:** Gene activator protein coding sequences and mCherry DNA sequence

|                                                                                                                                                                                                                                                                                                                                                                                                                                                                                                                                                                                                                                                                                                                                                                                                                                                                                                                                                                                                                                                                                                                                                                                                                                                                                                                                                                                                                                                                                                                                                                                                                                                                                                                                                                                                                                                                                                                                                                                                                                                                                                                                                                                                                                                                                                                                                                                                                                                                                                                                                                                                                                                                             |
|-----------------------------------------------------------------------------------------------------------------------------------------------------------------------------------------------------------------------------------------------------------------------------------------------------------------------------------------------------------------------------------------------------------------------------------------------------------------------------------------------------------------------------------------------------------------------------------------------------------------------------------------------------------------------------------------------------------------------------------------------------------------------------------------------------------------------------------------------------------------------------------------------------------------------------------------------------------------------------------------------------------------------------------------------------------------------------------------------------------------------------------------------------------------------------------------------------------------------------------------------------------------------------------------------------------------------------------------------------------------------------------------------------------------------------------------------------------------------------------------------------------------------------------------------------------------------------------------------------------------------------------------------------------------------------------------------------------------------------------------------------------------------------------------------------------------------------------------------------------------------------------------------------------------------------------------------------------------------------------------------------------------------------------------------------------------------------------------------------------------------------------------------------------------------------------------------------------------------------------------------------------------------------------------------------------------------------------------------------------------------------------------------------------------------------------------------------------------------------------------------------------------------------------------------------------------------------------------------------------------------------------------------------------------------------|
| <p><b>VPH-dCas9-SS18</b> (Flag-tag, VP64, p65, HSF1, SV40 NLS, dCas9, SS18, T2A, mCherry)</p> <p>MDYKDHGDDYKDHIDYKDDDDKHVDALDDFDLDMGLGSDALDDFDLDMGLGSDALDDFDLDMGLGSDALDDFDLDMGLGSDALDDFDLDMGLGSLPSASVEFEGSGGPGSQISNQALALAPSSAPVLAQTMVPSSAMVPLAQPPAPAPVLTGPPQSL SAPVPKSTQAGEGTLSEALLHLQFDAEDL GALLGNSTDPGVFTDLASVDNSEFQQLLNQGVSMHSTAEPMLMEYPEAITRLVTGSQRPPDPAPTPLGTSGLPNGLSGDEDFSSIADMDFSALLSQISSSGQGGGGSGFSVDTSALLDLFSPSVTPDMSLPDL DSSLASIQELLSPQEPPRPPEAENSSPDSGKQLVHYTAQPLFLLDPGSVDTSNDLPVLFELGEGSYFSEGDFGAEDPTISLLTGSEPPKAKDPTVSNPKKKRKVGRGMDKKYSIGLAIGTNSV GWAVITDEYKVPSKFKVLGNTDRHSIKKNLIGALLFDSGETAEATRLKRTARRRYTRRKNRI CYLQEIFSNEMAKVDDSSFFHRLEESFLVEEDKKHERHPIFGNIVDEVAYHEKYPTIYHLRKKLV DSTDKADLRILIYALAHMIKFRGHFLIEGDLNPDNSDVKLFIQLVQTYNQLFEENPINASGVD AKAILSARLSKSRLENLIAQLPGEKKNLFGNLIALSLGLTPNFKSNFDLAEDAKLQLSKDTY DDDLNLALQIGDQYADLFLAAKNLSAILLSDILRVNTEITKAPLSASMIKRYDEHHQDLTLLK ALVRQQLPEKYKEIFFDQSKNGYAGYIDGGASQEEFYKFIKPILEKMDGTEELLVVLNRELL RKQRTFDNGSIPHQIHLGELHAILRRQEDFYFPLKDNREKIEKILTFRIPYYVGPLARGNSRFA WMTRKSEETITPWNFEVVDKGASAQSFIERMTNFDKNLPNEKVLPHKSLLEYFTVYNELT KVKYVTEGMRKPAFLSGEQKKAIVDLLFKTNRKVTVKQLKEDYFKKIECFDSVEISGVEDRFN ASLGTYHDLLKIKDKDFLDNEENEDILEDIVLTLTLFEDREMIEERLKYAHLFDDKVMKQLKR RRYTGWGRLSRKLINGIRDKQSGKTILDFLKSDGFANRNFMLIHDDSLTFKEDIQKAQVSG QGDSLHEHIANLAGSPAIKKILQTVKVVDELVKVMGRHKPENIVIAMARENQTTQKGQKNS RERMKRIEEGKELGSQILKEHPVENTQLQNEKLYLYLQNGRDMYVDQELDINRLSDYDVD AIVPQSFLKDDSIDNKVLRSDKNRGKSDNVPSEEVKKMKNYWRQLLNAKLITQRKFDNLT KAERGGELSEDKAGFIKRQLVETRQITKHVAQILDSRMNTKYDENDKLIREVKVITLKSCLVSD FRKDFQFYKVVREINNYHHAHDAYLNAVVG TALIKKYPKLESEFVYGDYKVYDVRKMIKSEQ EIGKATAKYFFYSNIMNFFKTEITLANGEIRKRPLIETNGETGEIVWDKGRDFATVRKVL SMPQ VNIVKKTEVQTGGFSKESILPKRNSDKLIARKKDWDPKKYGGFDSPTVAYSVLVAKVEK GK SKKLSVKELLGITIMERSSF EKNPIDFLEAKGYKEVKKDLIILPKYSLFELENGRKRMLASAG ELQKGNELALPSKYVNFLYLASHYEKLKGS PEDNEQKQLFVEQHKHYLDEIIEQISEFSKR VIL ADANLDKVL SAYNKH RDKPIREQAENIIHLFTLNLGAPAAFKYFDTTIDRKR YTSTKEVLDAT LIHQ SITGLYETRIDLSQLGGDSRADPKKKRKVASMSVAFAPRQRGKGEITPAAIQKMLDDN NHLIQCIMDSQNKGKTSECSQYQQLHTNLVYLATIADSNQNMQSLLPAPPTQNMMPMGPGG MNQSGPPPPRSHNMPSDGMVGGGPPAPHMQNQMNGQMPGNHMPMQGPGPNQLNM TNSSMNMPSSSHGSMGGYNHVPSSQSMPVQNQMTMSQGQPMGNYGPRPNMSMQPNQ GPMMHQQPPSQQYNMPQGGGQHYQQQPPMGMVGQVNQGNHMMGQRQIPPYRPPQQ GPPQQYSGQEDYYGDQYSHGGQGPPEGMNQYYPDGNSQYGGQQDAYQGPPPPQQGYP PQQQQYYPGQQGYPGQQQGYGPSQGGPGPQYPNYPQGQQQYGGYRPTQPGPPPPQ QRPYGYDQGQYGNYYQASGSGEGRGSLLTCGDVEENPGPMVSKGEEDNMAIIEKFMSFKV HMEGSVNGHEFEIEGEGEGRPYEGTQTAKLKVTGGPLPFAWDILSPQFMYGSKAYVKHPA DIPDYLKLSFPEGFKWERVMNFEDGGVVTVTQDSSLQDGEFIYKVKLRGTNFPDGPVMQK KTMGWEASSERMYPEDGALKGEIKQLKLDGGHYDAEVKTTYKAKKPVQLPGAYNVNIKL DITSHNEDYTIVEQYERAEGRHSTGGMDELYK*</p> |
| <p><b>dCas9-VP64</b> (dCas9, SV40 NLS, VP64, T2A, mCherry)</p>                                                                                                                                                                                                                                                                                                                                                                                                                                                                                                                                                                                                                                                                                                                                                                                                                                                                                                                                                                                                                                                                                                                                                                                                                                                                                                                                                                                                                                                                                                                                                                                                                                                                                                                                                                                                                                                                                                                                                                                                                                                                                                                                                                                                                                                                                                                                                                                                                                                                                                                                                                                                              |

MDKKYSIGLAIGTNSVGWAVITDEYKVPSSKFKVLGNTDRHSIKKNLIGALLFDSGETAEATRL  
KRTARRRYTRRKNRICYLQEIFSNEMAKVDDSFHRLEESFLVEEDKKHERHPIFGNIVDEVA  
YHEKYPTIYHLRKKLVDSTDKADLRLIYLALAHMIKFRGHFLIEGDLNPDNSDVKLFIQLVQTY  
NQLFEENPINASGVDKAILSARLSKSRRENLIAQLPGEKKNGLFGNLIASLGLTPNFKSNF  
DLAEDAQLQLSKDQYDDDLNLLAQIGDQYADLFLAAKNLSDAILLSDILRVNTEITKAPLSAS  
MIKRYDEHHQDLTLLKALVRQQLPEKYKEIFFDQSKNGYAGYIDGGASQEEFYKFIKPILEKM  
DGTEELLVKNREDLLRKQRTFDNGSIPHQIHLGELHAILRRQEDFYFPLKDNREKIEKILTFRI  
PYYVGPLARGNSRFAWMTRKSEETITPWNFEVVDKGGASQAQSFIERMTNFDKNLPNEKVLP  
KHSLLYEFYFTVYNELTKVKYVTEGMRKPAFLSGEQKKAIVDLLFKTNRKVTVKQLKEDYFKKI  
ECFDSVEISGVEDRFNASLGTYHDLKIIKDKDFLDNEENEDILEDIVLTLTFEDREMIEERLK  
TYAHLFDDKVMKQLKRRRYTGWGRLSRKLINGIRDKQSGKTILDFLKSDFANRNFQMQLIHD  
DSLTFKEDIQKAQVSGQGDLSHEHIANLAGSPAIKKILQTVKVVDELVKVMGRHHPENIVIE  
ARENQTTQKGQNSRERMKRIEKGELGSQILKEHPVENTQLQNEKLYLYLQNGRDMYV  
DQELDINRLSDYDVAIVPQSFLKDDSIDNKVLRSDKNRGSNDNPSEEVVKMKMKNYWRQL  
LNAKLITQRKFDNLTKAERGGLSELDKAGFIKRLVETRQITKHVAQILDSRMNTKYDENDKLI  
REVKVITLKSCLVSDFRKDFQFYKREINNYHHAHDAYLNAVVGTAIKKYPKLESEFVYGDY  
KVYDVRKMIKSEQEIGKATAKYFFYSNIMNFFKTEITLANGEIRKRPLIETNGETGEIVWDKG  
RDFATVRKVLSPQVNIVKKTEVQTGGFSKESILPKRNSDKLIARKKDWDPKKYGGFDSPTV  
AYSVLVAKVEKGSKSKLKSVEKLLGITIMERSSEFEKNPIDFLEAKGYKEVKKDLIILPKYSLF  
ELENGRKRMLASAGELQKGNELALPSKYVNFLYLASHYEKLGSPEDNEQKQLFVEQHKHY  
LDEIIIEQISEFSKRVLADANLDKVL SAYNKHRDKPIREQAENIIHLFTLTNLGAPAAFKYFDTTID  
RKRYTSTKEVL DATLIHQ SITGLYETRIDLSQLGGDPIAGSKASPKKKRVGRADALDDFDLD  
MLGSDALDDFDLMLGSDALDDFDLMLGSDALDDFDLMLASGSGEGRGSLTTCGDVEE  
NPGPASGSGEGRGSLTTCGDVEENPGPMVSKGEEDNMAIIEFMSFKVHMEGSVNGHEFEI  
EGEGEGRPYEGTQAKLVTKGGPLPFAWDILSPQFMYGSKAYVKHPADIPDYLKLSFPEGF  
KWERVMNFEDGGVVTVDSSLDQGEFIYKVKLRGTNFPDGPVMQKKTMGWEASSERM  
YPEDGALKGEIKQLKLDGGHYDAEVKTTYKAKKPVQLPGAYNVNIKLDITSHNEDYTIVEQ  
YERAEGRHSTGGMDELYK\*

**dCas9-VPR** (dCas9, SV40 NLS, VPR (VP64, RelA(p65), Rta), P2A, mCherry)

MDKKYSIGLAIGTNSVGWAVITDEYKVPSSKFKVLGNTDRHSIKKNLIGALLFDSGETAEATRL  
KRTARRRYTRRKNRICYLQEIFSNEMAKVDDSFHRLSEESFLVEEDKKHERHPIFGNIVDEVA  
YHEKYPTIYHLRKKLVDSTDKADLRLIYLALAHMIKFRGHFLIEGDLNPDNSDVKLFIQLVQTY  
NQLFEENPINASGVDKAILSARLSKSRRENLIAQLPGEKKNGLFGNLIASLGLTPNFKSNF  
DLAEDAQLQLSKDQYDDDLNLLAQIGDQYADLFLAAKNLSDAILLSDILRVNTEITKAPLSAS  
MIKRYDEHHQDLTLLKALVRQQLPEKYKEIFFDQSKNGYAGYIDGGASQEEFYKFIKPILEKM  
DGTEELLVKNREDLLRKQRTFDNGSIPHQIHLGELHAILRRQEDFYFPLKDNREKIEKILTFRI  
PYYVGPLARGNSRFAMTRKSEETITPWNFEEVVDKGSASAQSFIERMTNFDKNLPNEKVLP  
KHSLLYEYFTVYNELTKVKYVTEGMRKPAFLSGEQKKAIVDLLFKTNRKVTVKQLKEDYFKKI  
ECFDSVEISGVEDRFNASLGTYHDLKIIKDKDFLDNEENEDILEDIVLTLTFEDREMIEERLK  
TYAHLFDDKVMKQLKRRRYTGWGRLSRKLINGIRDKQSGKTILDFLKSDFANRNFQMQLIHD  
DSLTFKEDIQKAQVSGQGDLSHEHIANLAGSPAIKKILQTVKVVDELVKVMGRHHPENIVEM  
ARENQTTQKGQNSRERMKRIEKGELGSQILKEHPVENTQLQNEKLYLYLQNGRDMYV  
DQELDINRLSDYDVAIVPQSFLKDDSIDNKVLRSDKARGKSDNVPSEEVVKKMKNYWRQL  
LNAKLITQRKFDNLTKAERGGLSELDKAGFIKRLVETRQITKHVAQILDSRMNTKYDENDKLI  
REVKVITLKSCLVSDFRKDFQFYKREINNYHHAHDAYLNAVVGTAIKKYPKLESEFVYGDY  
KVYDVRKMIKSEQEIGKATAKYFFYSNIMNFFKTEITLANGEIRKRPLIETNGETGEIVWDKG  
RDFATVRKVLSPQVNIKKTEVQTGGFSKESILPKRNSDKLIARKKDWDPKKYGGFDSPTV  
AYSVLVAKVEKGSKKLKSVEKLLGITIMERSSSFENPIDFLEAKGYKEVKKDLIILPKYSLF  
ELENGRKRMLASAGELQKGNELALPSKYVNFLYLASHYEKLGSPEDNEQKQLFVEQHKHY  
LDEIIEQISEFSKRVLADANLDKVL SAYNKHRDKPIREQAENIIHLFTLTNLGAPAAFKYFDTTID  
RKRYTSTKEVLDTLIHQSI TGLYETRIDLSQLGGDSRADPKKKRKV **SPGIRRLDALISTSLYK**  
**KAGYKEASGSGRADALDDFDLMLGSDALDDFDLMLGSDALDDFDLMLGSDALDDFDL**  
**DMLINSRSSGSPKKKRKVGSYLPDTPDRHRIEERKRYETFKSIMKKS PFSGPTDPRPPP**  
**RRIAVPSRSSASVPKPAPQYPFTSSLSTINYDEFPTMVFPSGQISQASALAPAPPQVLPQAP**  
**APAPAPAMVSALAQAQAPVPVLPAGPPQAVAPPAPKPTQAGEGTLSEALLQLQFDDDLGA**  
**LLGNSTDPVFTDLASVDNSEFQQLLNQGIPVAPHTTEPMLMEYPEAITRLVTGAQRPPDPA**  
**PAPLGAPGLPNGLLSGDEDFSSIADMDFSALLGSGSGSRDSREGMFLPKPEAGSAISDVFEQ**  
**REVCQPKRIRPFHPPGSPWANRPLPASLAPTPTGPVHEPVGSLTPAPVPQPLDPAPAVTPE**  
**ASHLLEDPEETSQAVKALREMA DTVIPQKEEAICGQMDLSHPPPRGHLDLDTTLESMTD**  
**DLNLDSP LPELNEILD TFLNDECLLHAMHISTGLSIFDTSLFGSGATNFSLLKQAGDVEENPG**  
**PGSGATNFSLLKQAGDVEENPGPMVSKGEEDNMAIIEFMSFKVHMEGSVNGHEFEIEGEG**  
**EGRPYEGTQAKLKVTKGGPLPFAWDILSPQFMYGSKAYVKHPADIPDYLLKLSFPEGFKWE**  
**RVMNFEDGGVVTVTQDSSLQDGEFIYKVKLRGTNFPDGPVMQKKTMGWEASSERMYPED**  
**GALKGEIKQRLKLDGGHYDAEVKTTYKAKKPVQLPGAYNVNIKLDITSHNEDYIVEQYERA**  
**EGRHSTGGMDELYK\***

**dCas9-p300** (dCas9, **Nucleoplasmin NLS**, **p300**, **T2A**, **mCherry**)

MDKKYSIGLAIGTNSVGWAVITDEYKVPSKFKVLGNTDRHSIKKNLIGALLFDSGETAEATRL  
KRTARRRYTRRKNRICYLQEIFSNEMAKVDDSFHRLSEESFLVEEDKKHERHPIFGNIVDEVA  
YHEKYPTIYHLRKKLVDSTDKADLRLIYLALAHMIKFRGHFLIEGDLNPDNSDVKLFIQLVQTY  
NQLFEENPINASGVDKAILSARLSKSRRENLIAQLPGEKKNGLFGNLIASLGLTPNFKSNF  
DLAEDAQLQLSKDQYDDDLNLLAQIGDQYADLFLAAKNLSDAILLSDILRVNTEITKAPLSAS  
MIKRYDEHHQDLTLLKALVRQQLPEKYKEIFFDQSKNGYAGYIDGGASQEEFYKFIKPILEKM  
DGTEELLVKNREDLLRKQRTFDNGSIPHQIHLGELHAILRRQEDFYFPLKDNREKIEKILTFRI  
PYYVGPLARGNSRFAWMTRKSEETITPWNFEVVDKGGASQAQSFIERMTNFDKNLPNEKVLP  
KHSLLYEFYTVYNELTKVKYVTEGMRKPAFLSGEQKKAIVDLLFKTNRKVTVKQLKEDYFKKI  
ECFDSVEISGVEDRFNASLGTYHDLKIIKDKDFLDNEENEDILEDIVLTLTFEDREMIEERLK  
TYAHLFDDKVMKQLKRRRYTGWGRLSRKLINGIRDKQSGKTILDFLKSDFANRNFQMQLIHD  
DSLTFKEDIQKAQVSGQGDSLHEHIANLAGSPAIKKILQTVKVVDELVKVMGRHHPENIVIE  
ARENQTTQKGQKNSRERMKRIEKGELGSQILKEHPVENTQLQNEKLYLYLQNGRDMYV  
DQELDINRLSDYDVAIVPQSFLKDDSIDNKVLRSDKNRKGSDNVPSEEVVKKMKNYWRQL  
LNAKLITQRKFDNLTKAERGGLSELDKAGFIKRLVETRQITKHVAQILDSRMNTKYDENDKLI  
REVKVITLKSCLVSDFRKDFQFYKREINNYHHAHDAYLNAVVGTAIKKYPKLESEFVYGDY  
KVYDVRKMIKSEQEIGKATAKYFFYSNIMNFFKTEITLANGEIRKRPLIETNGETGEIVWDKG  
RDFATVRKVLVSMQVNVKKEVQTTGGFSKESILPKRNSDKLIARKKDWDPKYYGGFDSPTV  
AYSVLVVAKEKGSKLLKSVKELLGITIMERSSSFENPIDFLEAKGYKEVKKDLIILPKYSLF  
ELENGRKRMLASAGELQKGNELALPSKYVNFYLASHYEKLGSPEDNEQKQLFVEQHKHY  
LDEIIEQISEFSKRVLADANLDKVL SAYNKHRDKPIREQAENIIHLFTLTNLGAPAAFKYDFTTID  
RKRYTSTKEVLDTLIHQITGLYETRIDLSQLGGDKRPAATKKAGQAKKKKGSIFKPEELRQ  
ALMPTLEALYRQDPESLPFRQPVPDQLLGIPIYFDIVKSPMDLSTIKRKLDTGQYQEPWQYV  
DDIWLMMFNNAWLYNRKTSRVYKYCSKLSEVFEQEIDPVMQSLGYCCGRKLEFSPQTLCCYG  
KQLCTIPRDATYYSYQNRHYFCEKCFNEIQGESVSLGDDPSQPQTINKEQFSKRKNDTLDP  
ELFVECTECGRKMHQICVLHHEIWPAGFVCDGCLKKSARTRKENKFSARLPSTRLGTFL  
NRVNDFLRRQNHPESEGEVTVRVVHASDKTVEVKPGMKARFVDSGEMAESFPYRTKALFAF  
EEIDGVDLCFFGMHVQEYGSDCPPPNQRRVYISYLDVHFFRPKCLRTAVYHEILIGYLEYVK  
KLGYYTGHVACPPSEGGDYIFHCHPPDQKIPKPKRLQEWYKMLDKAVSERIVHDYKDIFK  
QATEDRLTSAKELPYFEGDFWPNVLEESIKELEQEEEEERKREENTSNESTDVTKGDSKNAK  
KNNKKTSKNKSSLRGNKKKPGMPNVSNDLSQKLYATMEKHKEVFFVIRLIAGPAANSPLPIV  
DPDPLIPCDLMDGRDAFLTLARDKHLEFSSLRRAQWSTMCMMLVELHTQSQDGSSEGRGSLT  
CGDVEENPGPGSEGRGSLTTCGDVEENPGPMVSKGEEDNMAIIEFMSFKVHMEGVSNGH  
EFEIEGEGEGRPYEGTQTAKLKVTKGGPLPFAWDILSPQFMYGSKAYVKHPADIPDYKLSF  
PEGFKWERVMNFEDGGVVTQDSSLQDGEFIYKVKLRGTNFPDGPVMMQKKTMGWEAS  
SERMYPEDGALKGEIKQRLKLDGGHYDAEVKTTYKAKKPVQLPGAYNVNIKLDITSHNEDY  
TIVEQYERAEGRHSTGGMDELYK\*

**AcrIIA4** (AcrIIA4, P2A, BFP)

MNLKELVREIKNKDYTAKLSGTDSNSITQLIIVNNDGNEYGISESNFESIVEKRVSTFENGWD  
GAYEDEEEFYNDMQRDIVNRHFKGSGATNFSLLKQAGDVEENPGPGSGATNFSLLKQAGDV  
EENPGPSELIKENMHMKLYMEGTVDNHHFKCTSEGEGKPYEGTQTMRIKVVGGPLPFAFD  
ILATSFLYGSKTFINHTQGIPDFFKQSFPEGFTWERVTTYEDGGVLTATQDTSLQDGLIYNV  
KIRGVNFTSNGPVMQKKTGLWEAFTETLYPADGGLEGRNDMALKLVGGSHLIANIKTTYRSK  
KPAKNLKMPGVYVVDYRLERIKEANNETYVEQHEVAVARYCDLPSKLGHLN\*

**mCherry** (DNA sequence)

ATGGTGAGCAAGGGCGAGGAGGATAACATGGCCATCATCAAGGAGTTCATGAGCTTCAA  
GGTGACATGGAGGGCTCCGTGAACGGCCACGAGTTCGAGATCGAGGGCGAGGGCGA  
GGCCCGCCCTACGAGGGCACCCAGACCGCCAAGCTGAAGGTGACCAAGGGTGGCCC  
CCTGCCCTTCGCCTGGGACATCCTGTCCCCTCAGTTCATGTACGGCTCCAAGGCCTACG  
TGAAGCACCCCGCCGACATCCCCGACTACTTGAAGCTGTCCTTCCCCGAGGGCTTCAAG  
TGGGAGCGCGTGATGAACTTCGAGGACGGCGGCGTGGTGACCGTGACCCAGGACTCCT  
CCCTGCAGGACGGCGAGTTCATCTACAAGGTGAAGCTGCGCGGCACCAACTTCCCCTC  
CGACGGCCCCGTAATGCAGAAGAAAACCATGGGCTGGGAGGCCTCCTCCGAGCGGATG  
TACCCCGAGGACGGCGCCCTGAAGGGCGAGATCAAGCAGAGGCTGAAGCTGAAGGAC  
GGCGGCCACTACGACGCTGAGGTCAAGACCACCTACAAGGCCAAGAAGCCCGTGCAGC  
TGCCCGGCGCCTACAACGTCAACATCAAGTTGGACATCACCTCCCACAACGAGGACTAC  
ACCATCGTGGAACAGTACGAACGCGCCGAGGGCCGCCACTCCACCGGCGGCATGGAC  
GAGCTGTACAAGTAGTAA

**Table S3:** Ordinary Two-way ANOVA & Post Test Results

| <b>%mCherry+</b>              |                             |                |                                          |                   |                           |                         |
|-------------------------------|-----------------------------|----------------|------------------------------------------|-------------------|---------------------------|-------------------------|
| <b>Ordinary Two-way ANOVA</b> |                             |                | <b>Tukey's multiple comparisons test</b> |                   |                           |                         |
| <b>Source of Variation</b>    | <b>% of total variation</b> | <b>P value</b> | <b>Comparison</b>                        | <b>Mean Diff.</b> | <b>95.00% CI of diff.</b> | <b>Adjusted P Value</b> |
| Interaction                   | 23.3                        | 0.0051         | VPR vs. VP64                             | -6.906            | -12.34 to -1.467          | 0.0101                  |
| gRNA                          | 12.32                       | 0.0136         | VPR vs. P300                             | -15.97            | -21.41 to -10.53          | <0.0001                 |
| Activator                     | 37.99                       | <0.0001        | VP64 vs. P300                            | -9.067            | -14.51 to -3.628          | 0.0007                  |
| <b>mCherry MFI</b>            |                             |                |                                          |                   |                           |                         |
| <b>Ordinary Two-way ANOVA</b> |                             |                | <b>Tukey's multiple comparisons test</b> |                   |                           |                         |
| <b>Source of Variation</b>    | <b>% of total variation</b> | <b>P value</b> | <b>Comparison</b>                        | <b>Mean Diff.</b> | <b>95.00% CI of diff.</b> | <b>Adjusted P Value</b> |
| Interaction                   | 15.17                       | <0.0001        | VPR vs. VP64                             | -359.1            | -449.9 to -268.2          | <0.0001                 |
| gRNA                          | 2.948                       | 0.0596         | VPR vs. P300                             | -632.8            | -723.7 to -542.0          | <0.0001                 |
| Activator                     | 72.89                       | <0.0001        | VP64 vs. P300                            | -273.8            | -364.6 to -182.9          | <0.0001                 |





**Table S5:** Primer-Probe set used in the study

| <b>Gene</b> | <b>Primer Probe set ID</b> | <b>Forward primer</b>    | <b>Reverse primer</b>         | <b>TaqMan probe</b>          |
|-------------|----------------------------|--------------------------|-------------------------------|------------------------------|
| B4galnt2    | Mm00484661_m1              | -                        | -                             | -                            |
| Epo         | Mm01202755_m1              |                          |                               |                              |
| Gapdh       | Mm99999915_g1              | -                        | -                             | -                            |
| mCherry     | -                          | TGAGGTCAAGA<br>CCACCTACA | CTGTTCCAC<br>GATGGTGT<br>AGTC | TTGGACATCACCTCC<br>CACAACGAG |

**Supplementary Figures**

a

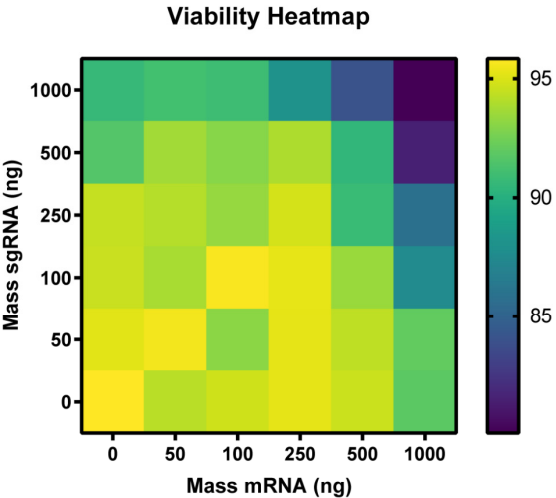

b

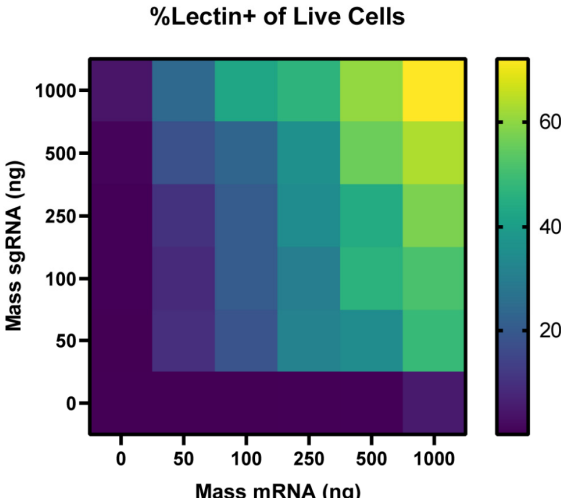

**Sup. Fig. 1 | *In vitro* dose optimization in AML12 cells by flow cytometry.** a, Heatmap showing the percentage of live cells (a) and lectin+ cells (b) with varying doses of VPR mRNA and sgRNA

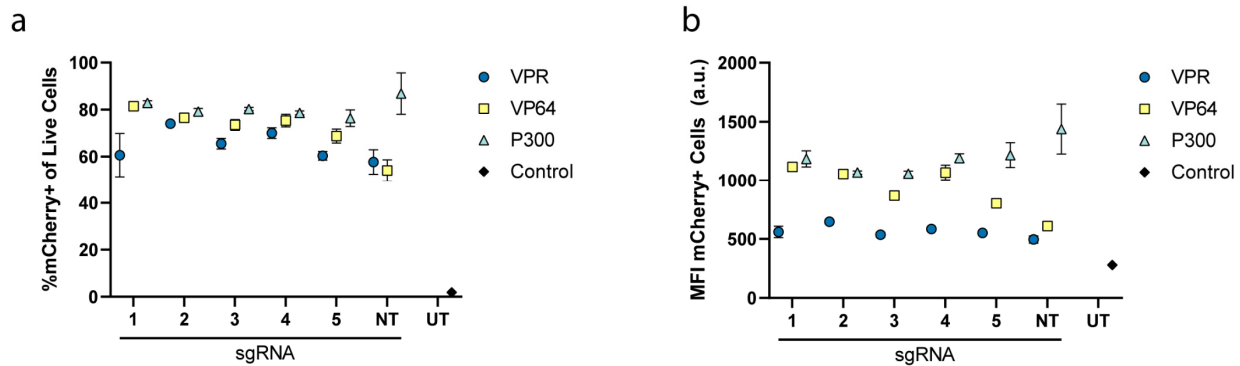

**Sup. Fig. 2 | mCherry expression from in vitro activator screen.** Each activator mRNA construct contained a cleavable mCherry sequence. **a**, Percentage of mCherry+ cells. **b**, MFI of mCherry+ cells. To assess differences in protein expression between the activator mRNA constructs, an ordinary two-way ANOVA was performed with Tukey's multiple comparisons test (**Table S2**) Data represent mean  $\pm$  SEM ( $n = 3$  biological replicates).

**a**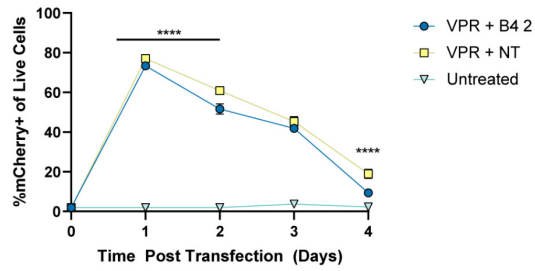**b**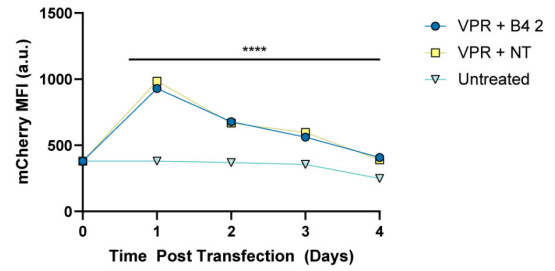

**Sup. Fig. 3 | mCherry expression from in vitro time course.** Each activator mRNA construct contained a cleavable mCherry sequence. **a**, Percentage of mCherry+ cells over time. **b**, MFI of mCherry+ cells. To assess differences in protein expression between the activator mRNA constructs over time. An ordinary two-way ANOVA was performed with Tukey's multiple comparisons test. Data represent mean  $\pm$  SEM ( $n = 3$  biological replicates).

a

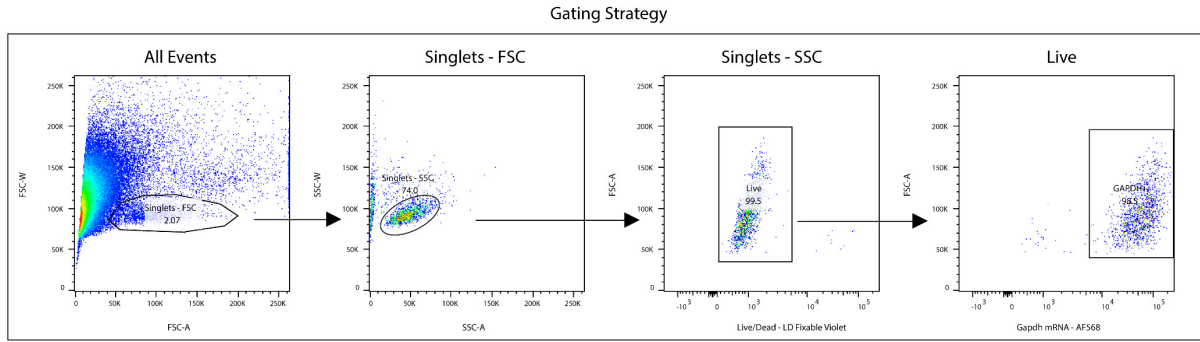

b

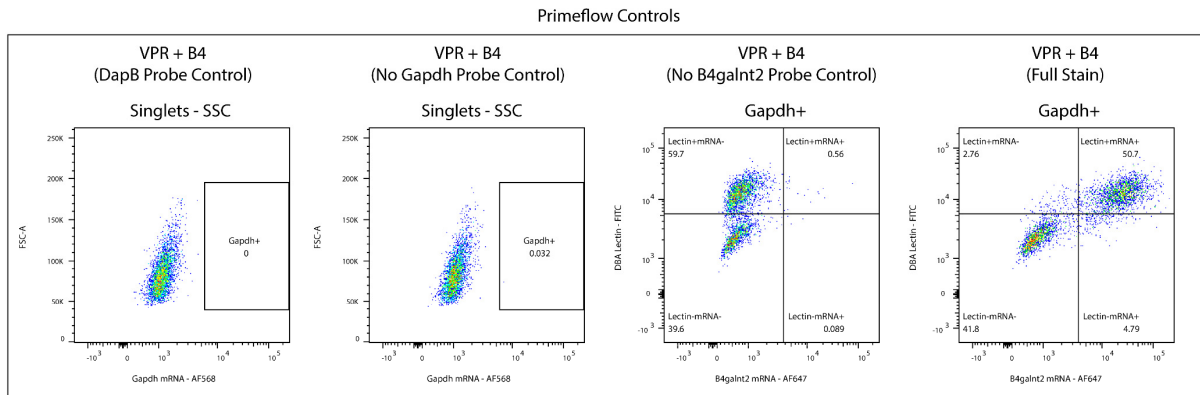

**Sup. Fig. 4 | Flow cytometry gating scheme and controls for PrimeFlow assay in AML12 cells. a, Gating strategy b, PrimeFlow controls demonstrating probe specificity (DapB control and no Gapdh control) and successful DBA lectin staining with simultaneous PrimeFlow mRNA signal.**

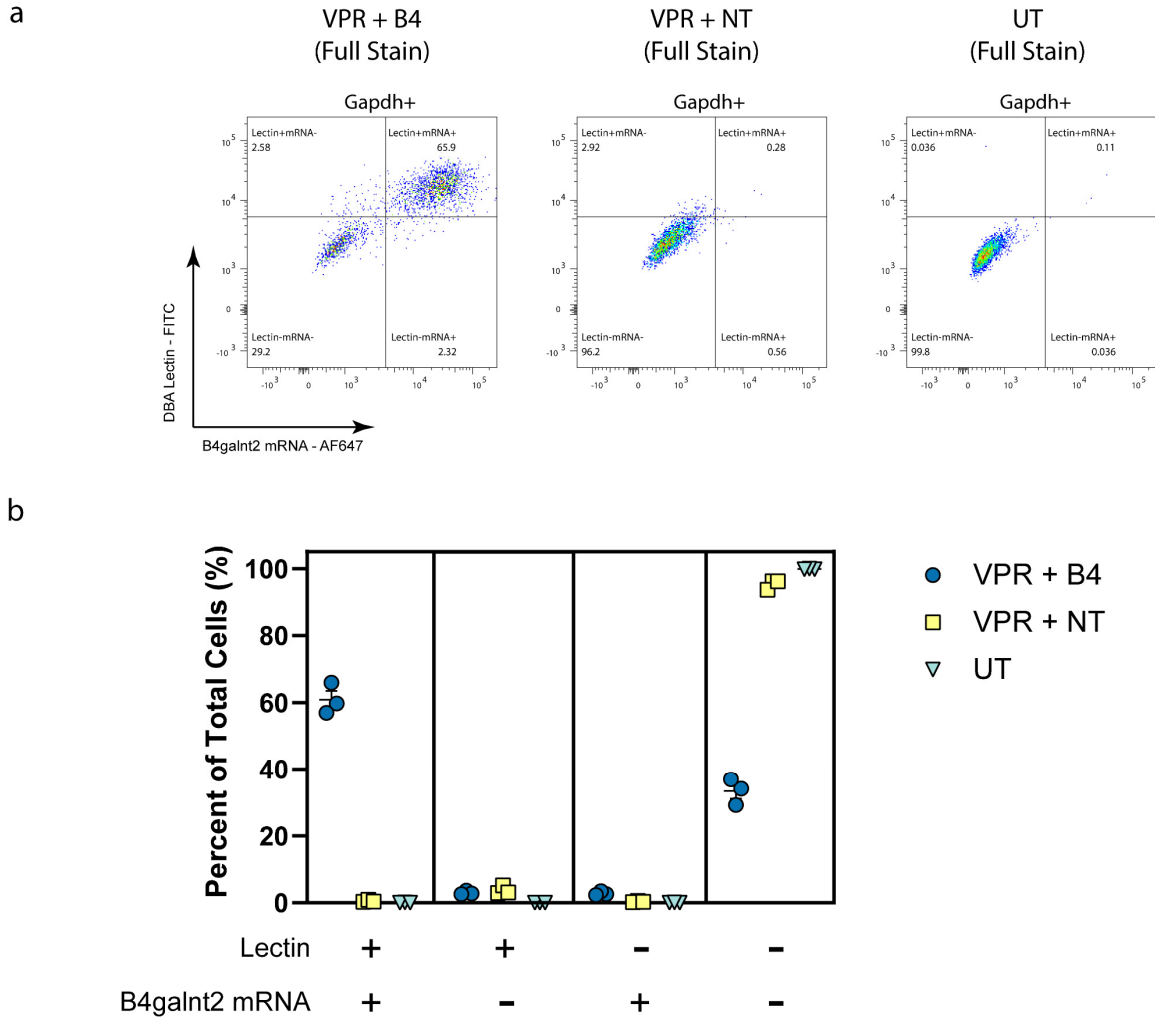

**Sup. Fig. 5 | Demonstration of B4galnt2 mRNA upregulation by PrimeFlow in AML12 cells.**  
**a**, Representative flow plots depicting the cell populations observed between treatment conditions as defined by B4galnt2 mRNA signal and lectin staining. **b**, Quantification of the percentage of cells according to B4galnt2 mRNA upregulation and lectin staining status. Data represent mean  $\pm$  SEM (n = 3 biological replicates).

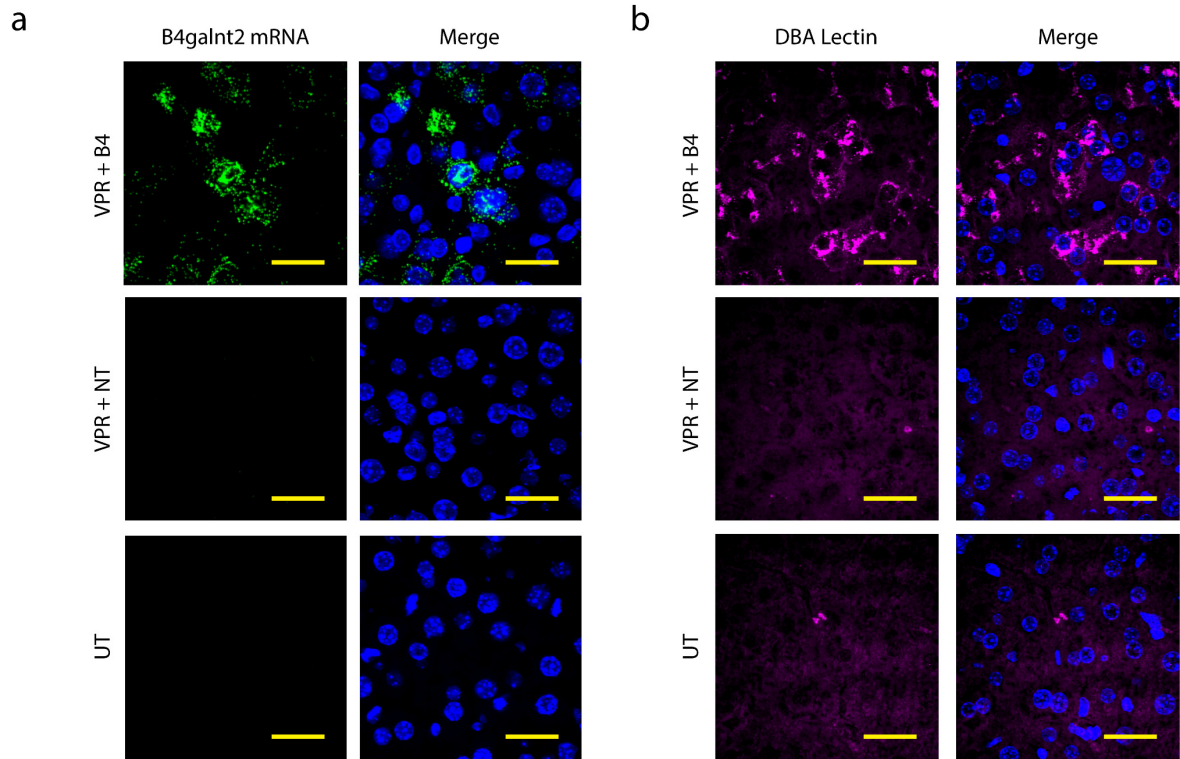

**Sup. Fig. 6 | Initial demonstration of successful B4galnt2 gene activation in liver samples.** Representative images showing RNAscope staining for B4galnt2 mRNA (green) (**a**), DBA lectin (magenta) (**b**), and DAPI (blue) at 1 day post injection. Scale bars are all 25  $\mu$ m

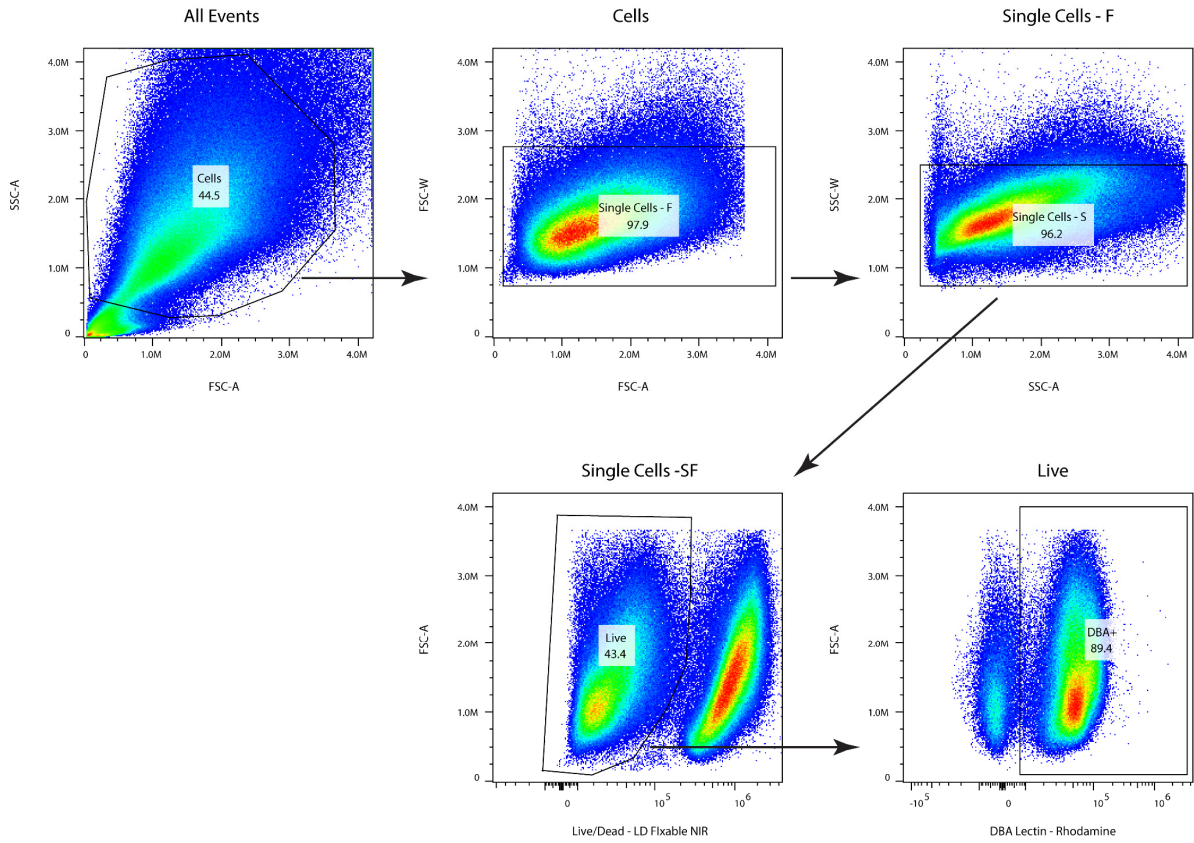

**Sup. Fig. 7 | Flow cytometry gating scheme for hepatocytes from liver cell suspensions.** Representative flow plots depict the gating strategy based on side-scatter and live/dead staining to gate on live hepatocytes.



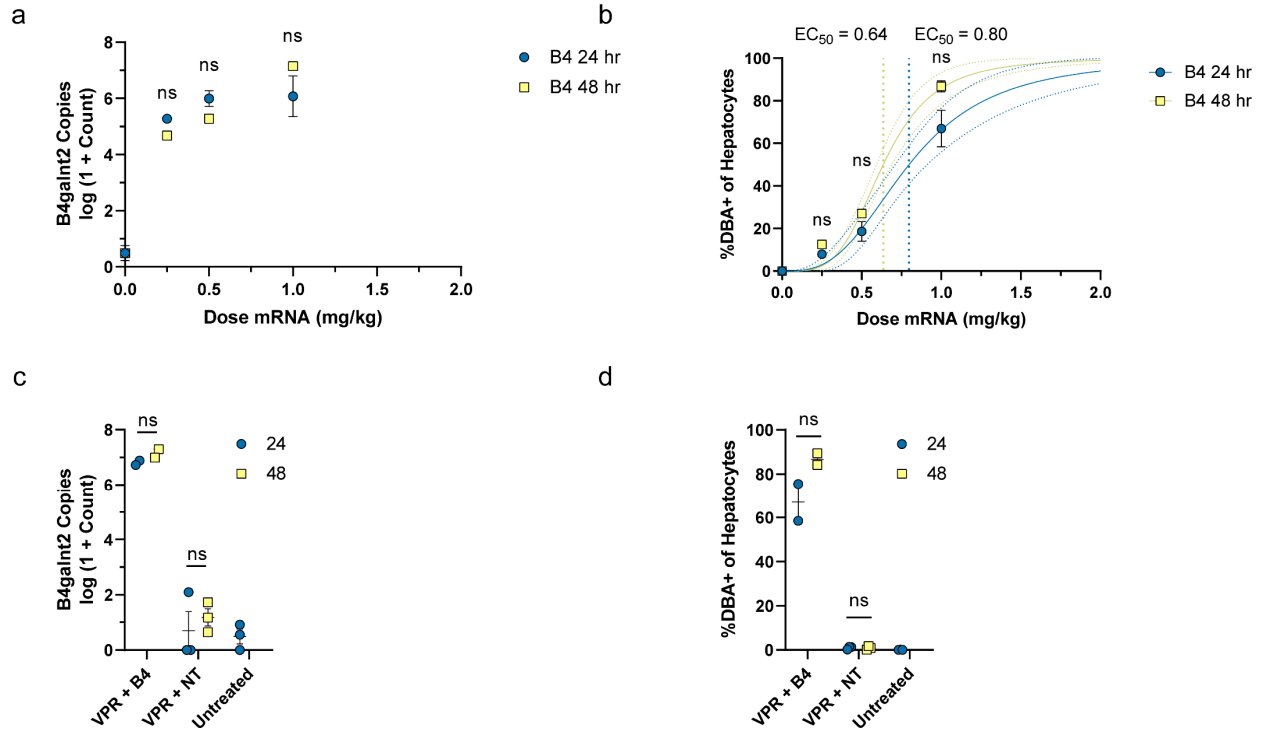

**Sup. Fig. 8 | Initial dose response results using combined LNP formulation approach.** B4galnt2 mRNA copy numbers (a) and percentage of activated hepatocytes (b) from liver cell suspensions at varying doses of VPR mRNA and B4-targeted sgRNA. (c,d) Comparison of B4galnt2 mRNA copy numbers and percentage of activated hepatocytes between treatment groups receiving either VPR mRNA + B4 sgRNA (1 mg/kg mRNA), VPR mRNA + NT sgRNA (1 mg/kg mRNA), or no treatment. Statistical significance was assessed using a two-way ANOVA followed by Dunnett's multiple comparison between 24 and 48 hours. (ns,  $P > 0.05$ ). 4PL curves were fit to data in b (solid lines = best fit curve, dotted lines = 95% CI). An extra sum-of-squares F-test was performed to assess statistical significance between the EC<sub>50</sub> values. When  $P > 0.05$ , a combined EC<sub>50</sub> values was reported for the curves.

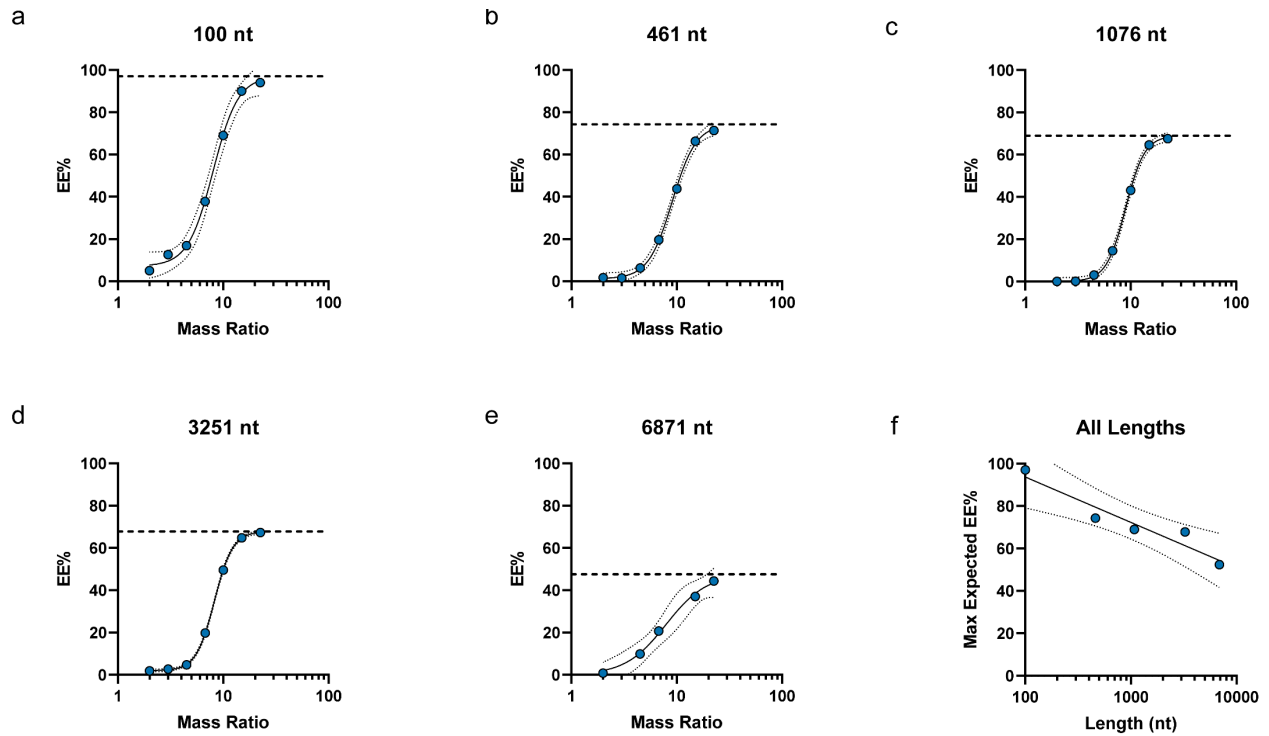

**Sup. Fig. 9 | Mass ratio and mRNA length influence encapsulation efficiency of LNPs.** Encapsulation efficiencies for cKK-E12 LNPs formulated with sgRNA (a) or different mRNAs with increasing lengths (b-e) at lipid:mRNA mass ratios ranging from 2 to 20. 4PL curves were fit to data in a-e (solid lines = best fit curve, dotted lines = 95% CI, horizontal dashed line = asymptotic top value). The asymptotic top values from each graph was plotted against RNA length (f), demonstrating a decrease in the theoretical maximum encapsulation efficiency with increasing length. Linear regression was performed for the combined data set ( $R^2 = 0.913$ , solid line = best fit, dotted lines = 95% CI). Pearson correlation analysis was also performed for the combined data set ( $r = -0.955$ ,  $P = 0.011$ ). All data points represent single replicates.

a

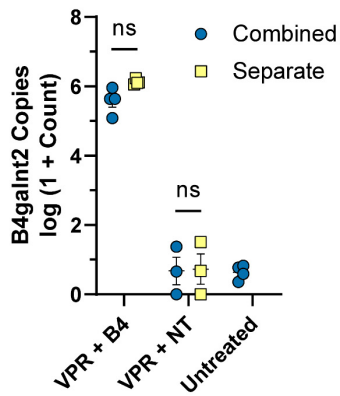

b

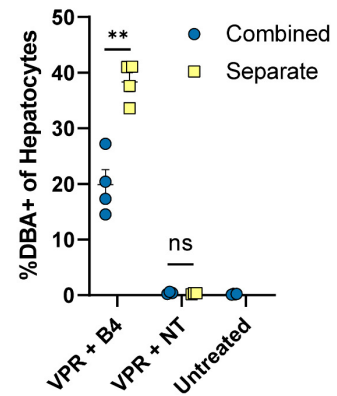

**Sup. Fig. 10 | Comparison of LNP formulation approaches.** a, B4galnt2 mRNA copy numbers in bulk hepatocytes (a) and percentage of activated hepatocytes (b) between combined and separate formulation approaches at a dose of 1 mg/kg VPR mRNA. Data represent mean  $\pm$  SEM (n = 3-4 mice). Statistical significance was assessed using a two-way ANOVA followed by Dunnett's multiple comparison between formulation approaches.

**a**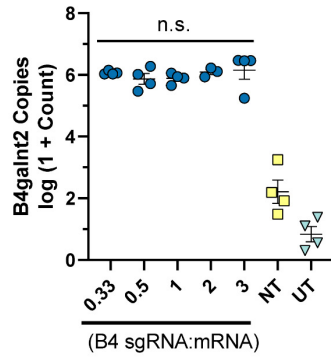**b**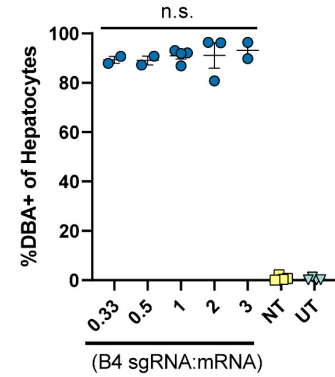**c**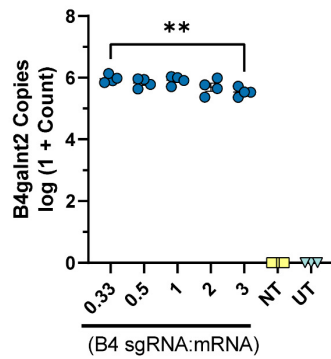**d**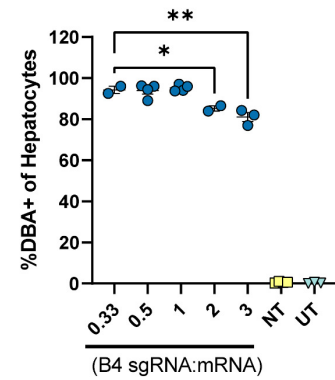

**Sup. Fig. 11 | mRNA and sgRNA titration for B4galnt2 gene activation.** (a, b) Titration results from fixed mRNA at 0.5 mg/kg and varying sgRNA:mRNA ratio between 1:3 and 3:1. (c, d) Titration results from fixed sgRNA at 0.5 mg/kg and varying sgRNA:mRNA ratio between 1:3 and 3:1. Data represent mean  $\pm$  SEM (n = 3-4 mice). Statistical significance was assessed using a one-way ANOVA followed by Dunnett's multiple comparison between each B4 treatment dose and a sgRNA:mRNA mass ratio of 3 (a, b) or a mass ratio of 1:3 (c, d). (\*P<0.05, \*\*P<0.01, \*\*\*P<0.001, \*\*\*\*P<0.0001).

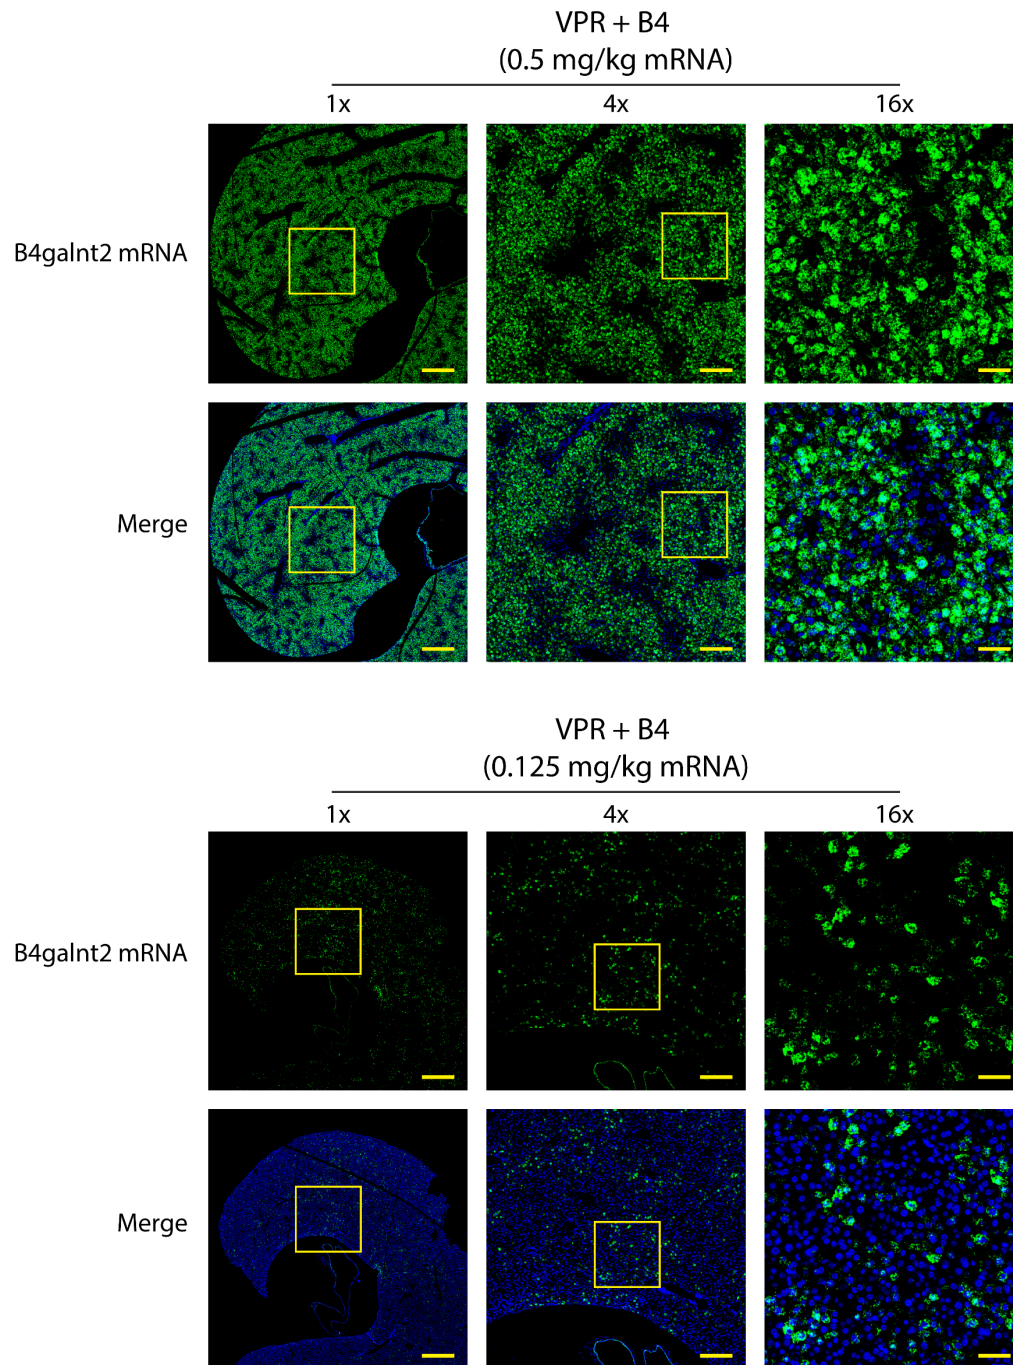

**Sup. Fig. 12 | Representative slide scan images of B4galnt2 mRNA upregulation at 0.5 mg/kg and 0.125 mg/kg mRNA dose.** Representative slide scan images of liver sections showing RNAscope staining for B4galnt2 mRNA (green) and DAPI (blue). The 0.125 mg/kg dose included in this figure is not contained in Figure 3a. Insets depict the relative locations of 4x and 16x views. Scale bars are 800  $\mu$ m for 1x, 200  $\mu$ m for 4x, and 50  $\mu$ m for 16x images.

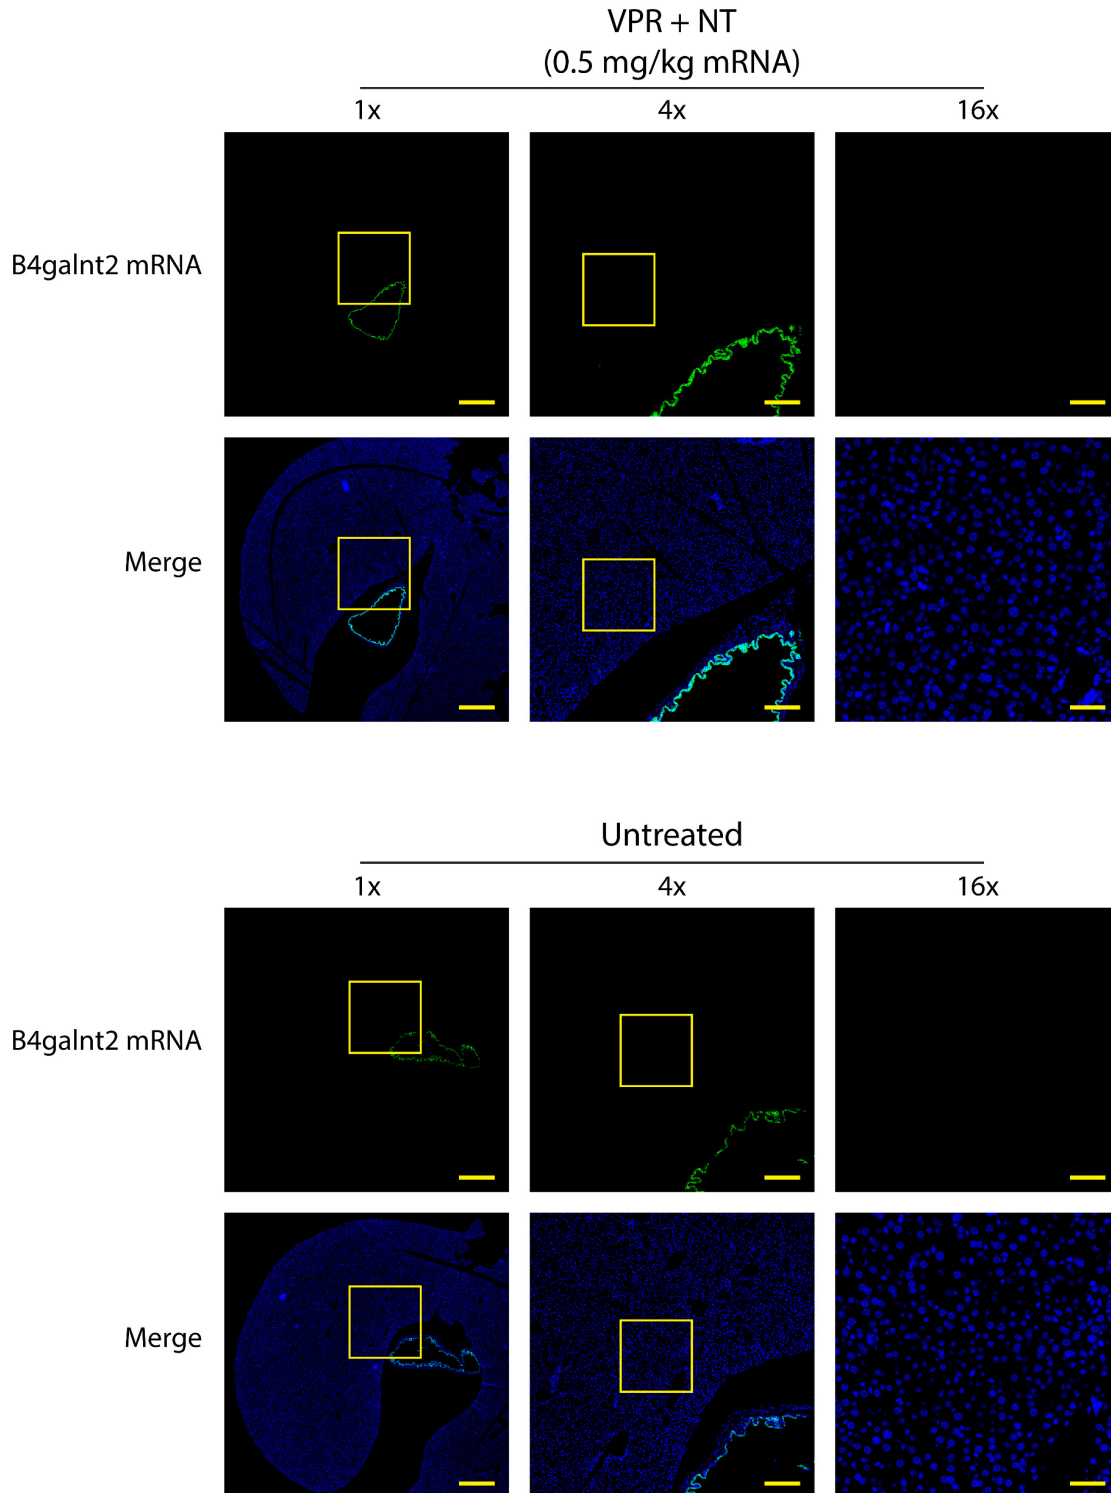

**Sup. Fig. 13 | Representative slide scan images of non-targeted control and untreated livers.** Representative slide scan images of liver sections showing RNAscope staining for B4galnt2 mRNA (green) and DAPI (blue). The untreated condition included in this figure is not contained in Figure 3a. Insets depict the relative locations of 4x and 16x views. Scale bars are 800  $\mu$ m for 1x, 200  $\mu$ m for 4x, and 50  $\mu$ m for 16x images. Basal B4galnt2 mRNA expression occurs in untreated mice in the gallbladder.

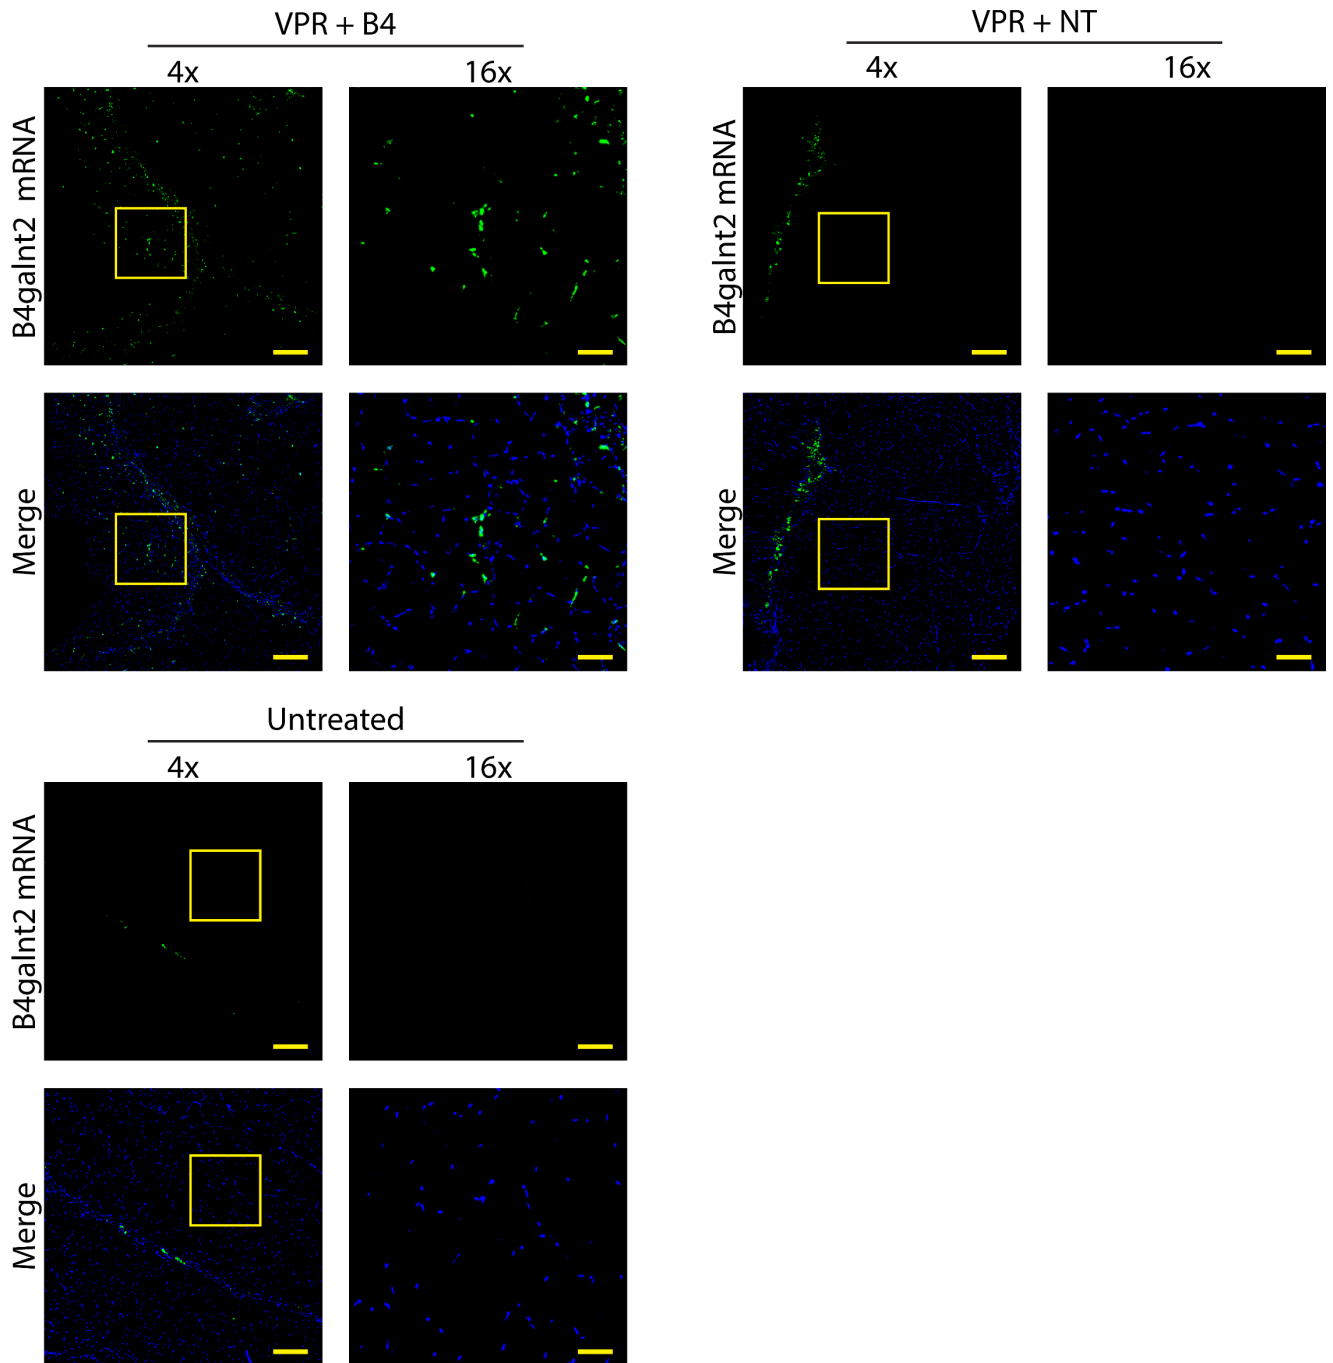

**Sup. Fig. 14 | Representative slide scan images of B4galnt2 mRNA upregulation in the quadriceps muscle.** Representative slide scan images of quadriceps muscle sections showing RNAscope staining for B4galnt2 mRNA (green) and DAPI (blue). The VPR mRNA + B4 sgRNA treatment group displays multiple activated cells within the muscle fibers. . Insets depict the relative locations of 16x views. Scale bars are 200  $\mu$ m for 4x and 50  $\mu$ m for 16x images

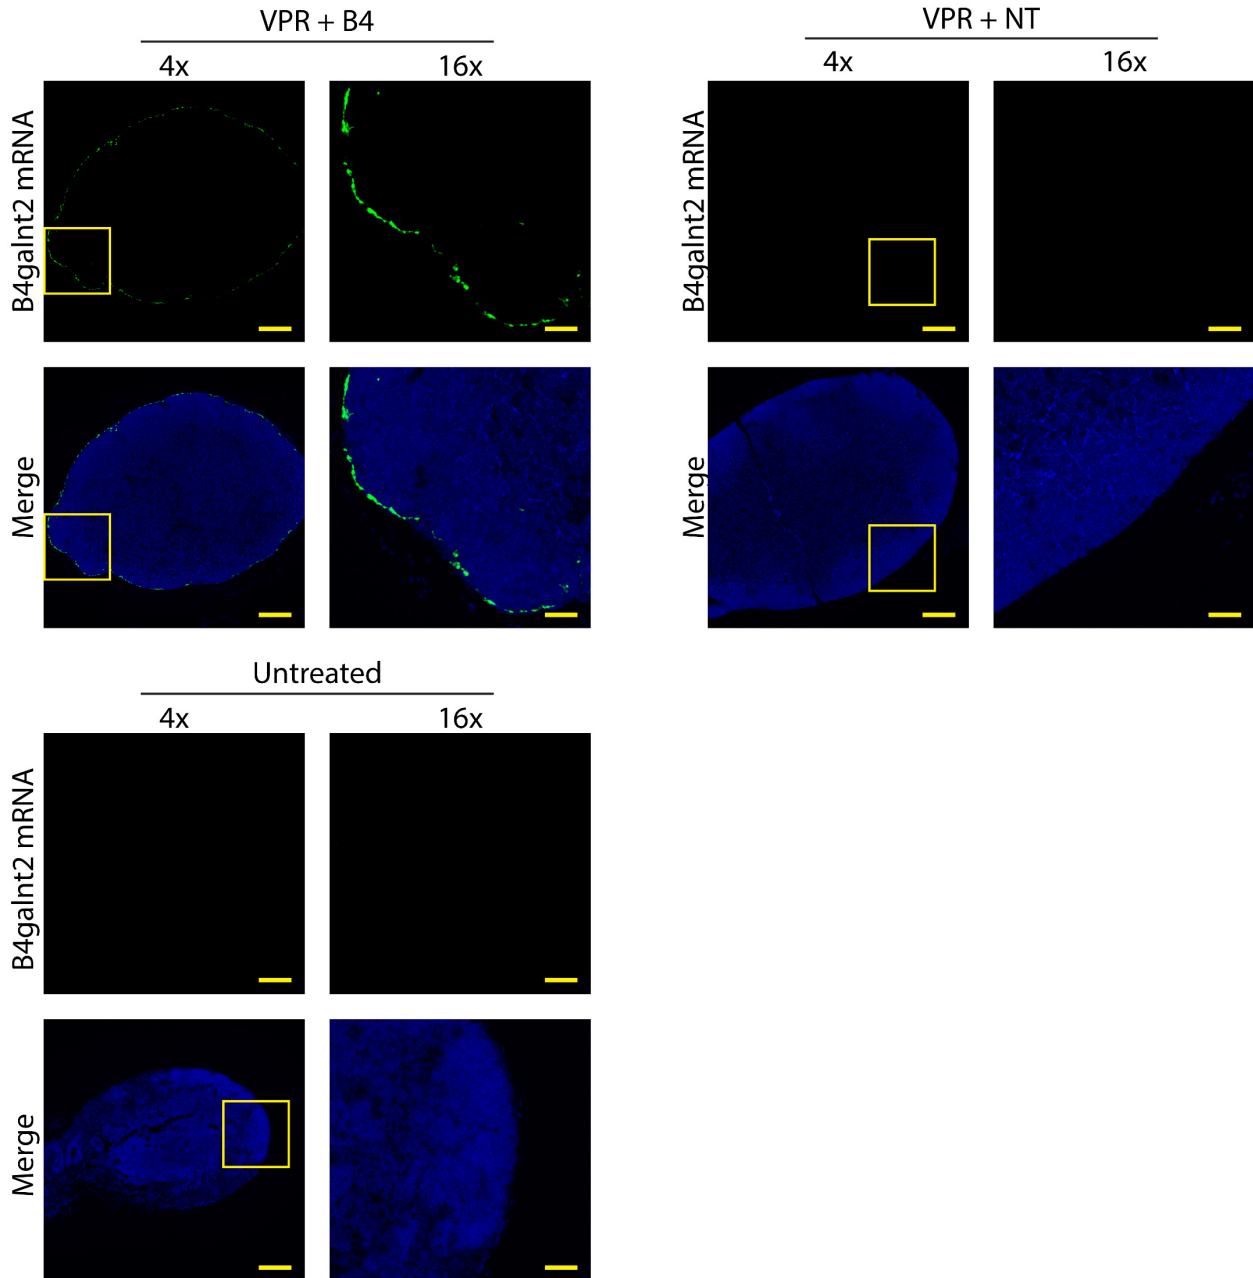

**Sup. Fig. 15 | Representative slide scan images of B4galnt2 mRNA upregulation in the paraaortic lymph node.** Representative slide scan images of paraaortic lymph node showing RNAscope staining for B4galnt2 mRNA (green) and DAPI (blue). The VPR mRNA + B4 sgRNA treatment group displays a strong ring of activated cells surrounding the lymph node. Insets depict the relative locations of 16x views. Scale bars are 200  $\mu\text{m}$  for 4x and 50  $\mu\text{m}$  for 16x images



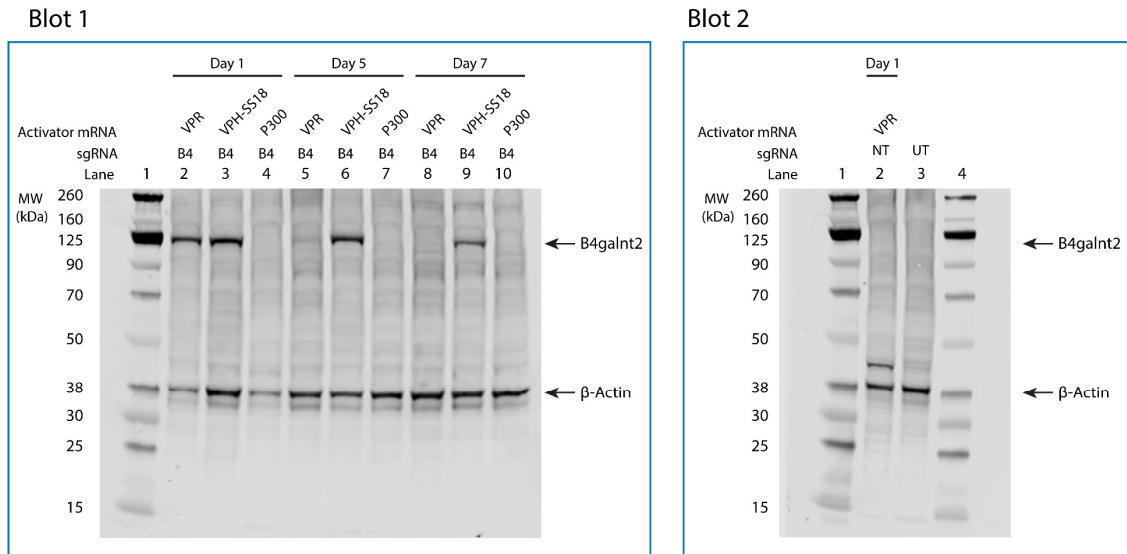

**Sup. Fig. 16 | Western blot images of B4galnt2 protein upregulation in liver samples.** Liver lysates were assessed for B4galnt2 protein, the dimeric protein (~125 kDa) is visible at ~125 kDa (63.25 kDa monomer) and actin (~38 kDa). Lanes are labeled with the activator mRNA and sgRNA injected into each animal. Blot 1, lane 1 and Blot 2 lanes 1 and 4 contain molecular weight ladders. Blot 2, lane 3 represents an untreated mouse.

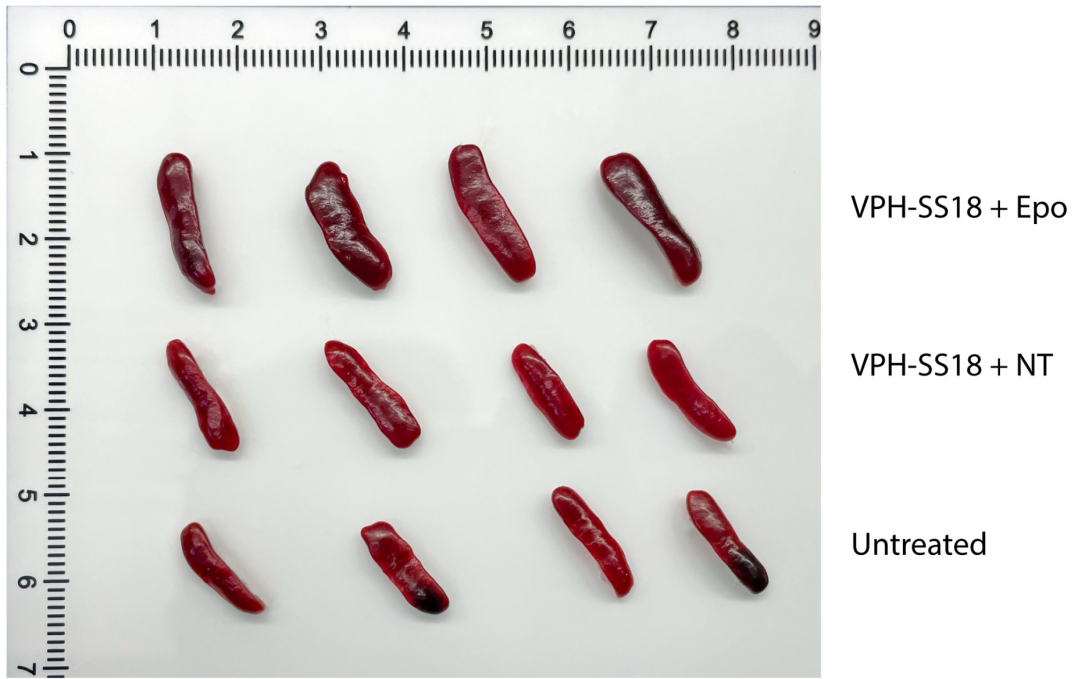

**Sup. Fig. 17 | Spleen images of from all mice 7 days post injection.** Ambient light images of spleens are organized by rows. Scale markers represent 1 cm.
